# Supplementary material
Source: HighWire-hosted journal article supplement (https://tech.snmjournals.org/highwire/filestream/8668/field_highwire_adjunct_files/0/203547_Supplemental_Data.pdf)
Supplement: 203547_Supplemental_Data.pdf [file 203547_Supplemental_Data.pdf]

**Supplemental Figure 1. Assay Format**

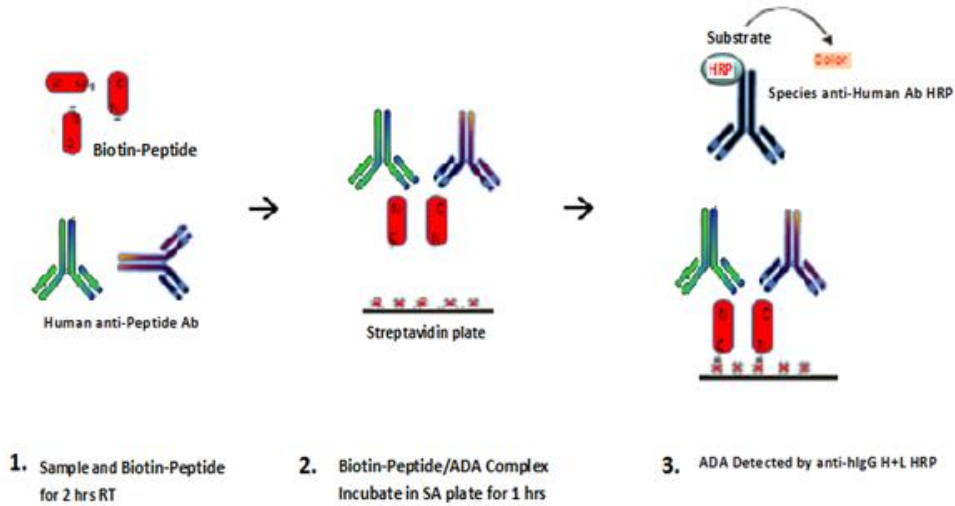

**Supplemental Figure 2. Positive Control Signals in Peptide Coated Plate**

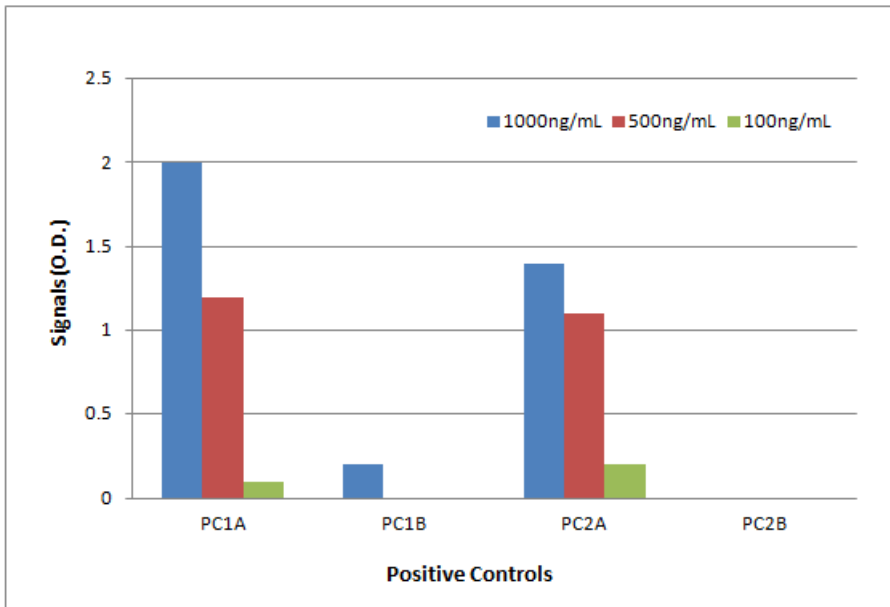

**Note:** this assay format had poor assay sensitivity and highly false-negative risk.

**Supplemental Figure 3. Positive Control Signals in Biotin-Peptide Coated Plate**

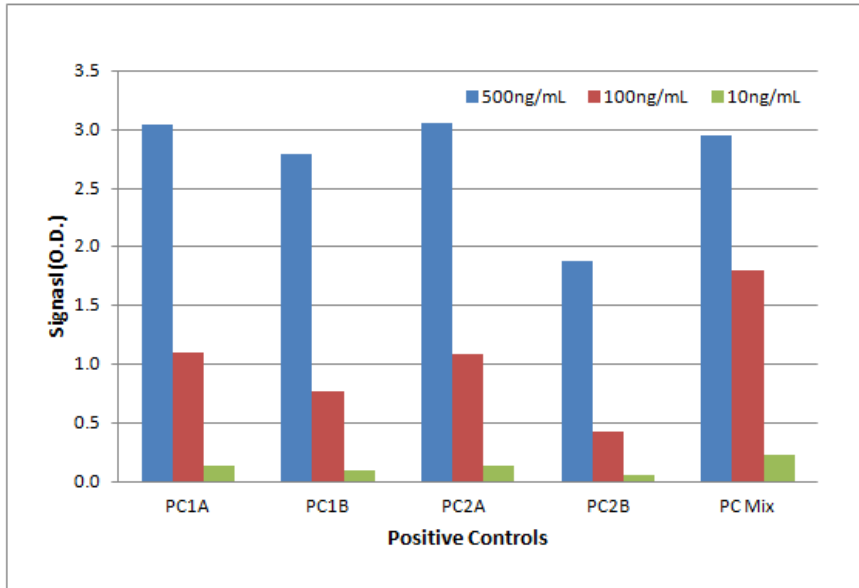

**Note:** N-/C-terminal biotin-peptides eliminated false-negative, enhanced sensitivity and reduced peptide interference.

**Supplemental Figure 4. PC Ab Specificity Test with Fibronectin**

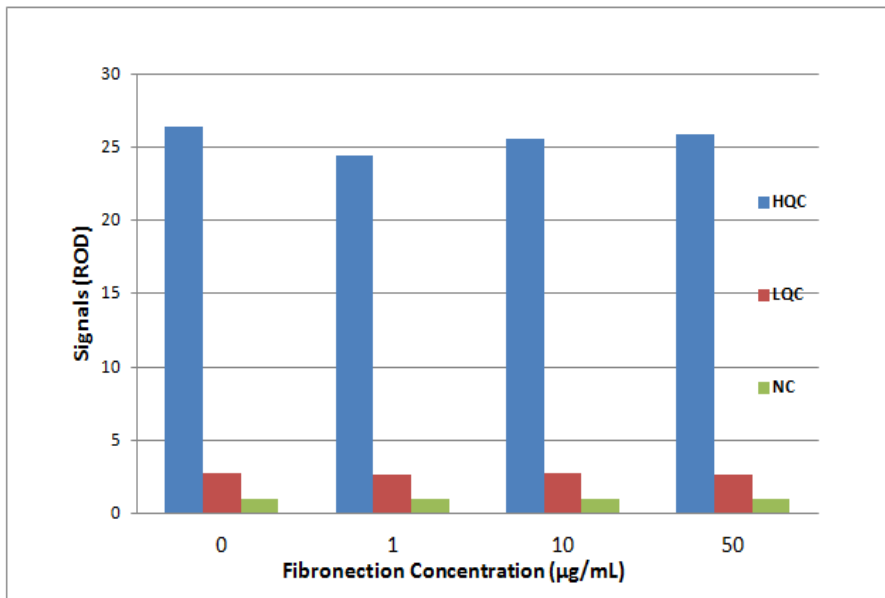

**Note:** the assay positive control antibody was specific to non-human regions of peptide and didn't have cross-reactive to RGD motifs on fibronectin.

### Supplemental Figure 5. Assay Specificity (Signal %Inhibition)

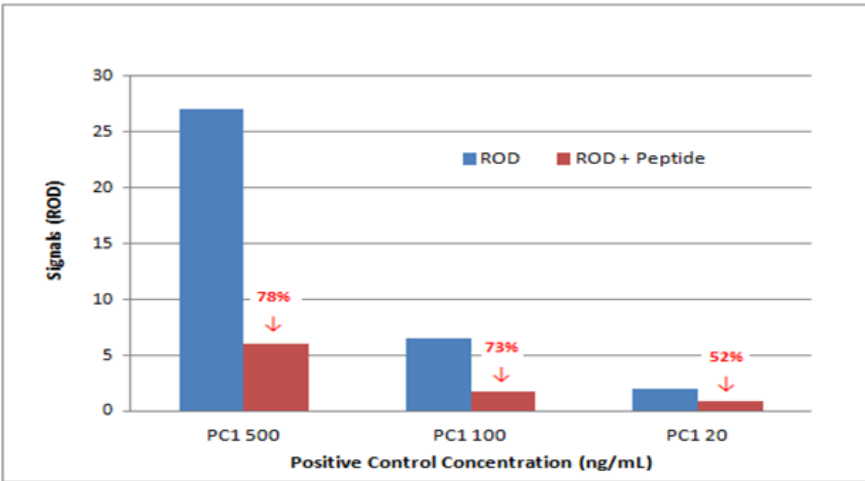

**Note:** Positive control signals could be specifically inhibited by peptide.

### Supplemental Figure 6. Protein sequence alignment of RGD peptides

|                            | 1 | 2 | 3 | 4 | 5 | 6 | 7 | 8 | 9 | 10 | 11 | 12 | 13 | 14 | 15 | 16 | 17 | 18 | 19 | 20 |                  |
|----------------------------|---|---|---|---|---|---|---|---|---|----|----|----|----|----|----|----|----|----|----|----|------------------|
| GSK2634673 [18F]-4-FBA-HN- | N | A | V | P | N | L | R | G | D | L  | Q  | V  | L  | A  | Q  | K  | V  | A  | R  | T  | -NH <sub>2</sub> |
| FMDV type O, VP1           | N | A | V | P | N | L | R | G | D | L  | Q  | V  | L  | A  | Q  | K  | V  | A  | R  | T  |                  |
| FMDV type C, VP1           | T | Y | A | A | S | A | R | G | D | L  | A  | H  | L  | T  | T  | T  | H  | A  |    |    |                  |
| Tenascin-C:                | V | S | L | I | S | R | R | G | D | M  | S  | S  | N  | P  | A  | K  | E  | T  | F  | T  |                  |
| Fibronectin III (dimer)    | V | Y | A | V | T | G | R | G | D | S  | P  | A  | S  | S  | K  | P  | I  | S  | I  | N  |                  |
| LAP-TGFβ (dimer)           | G | F | T | T | G | R | R | G | D | L  | A  | T  | I  | H  | G  | M  | N  | R  | P  | F  |                  |
| Fibronogen                 | S | S | T | S | Y | N | R | G | D | S  | T  | F  | E  | S  | K  |    | S  | Y  |    |    |                  |
| Vitronectin                | C | K | P | Q | V | T | R | G | D | V  | F  | T  | M  | P  | E  | D  | E  | Y  |    |    |                  |

**RGD** Specifically binding to integrins (αvβ6, β1, β3, β5...integrins)  
**DLxxL** Highly specific inhibition of RGD-dependent ligand binding to αvβ6 integrin  
 Many other integrin ligands (e.g. collagen,laminin...) and some virus proteins also contain RGD motif  
 GSK2634673: [18F]-FBA-A20FMDV2 peptide (20 a.a. MW: 2284)  
 4-fluorobenzamide (FBA) is a linker
